# Supplementary material
Source: PubMed Central journal article supplement (PMC10636642)

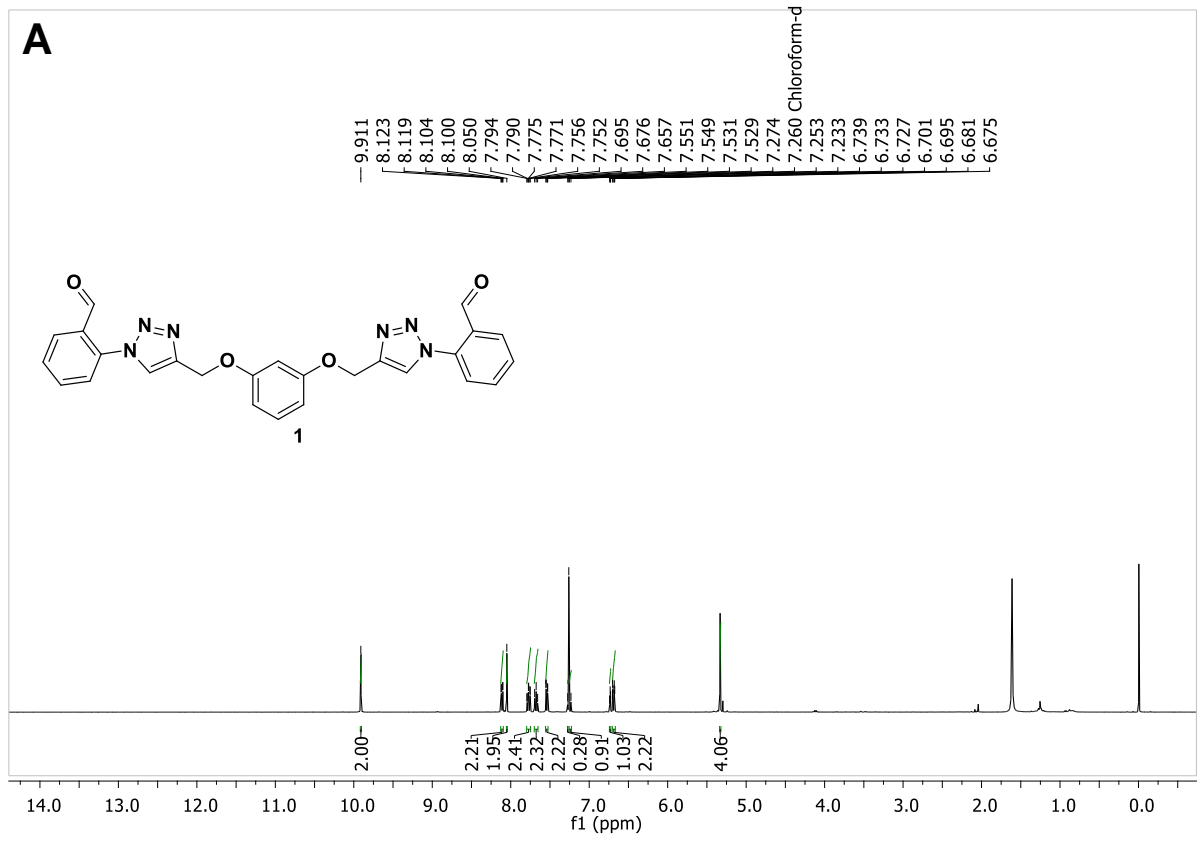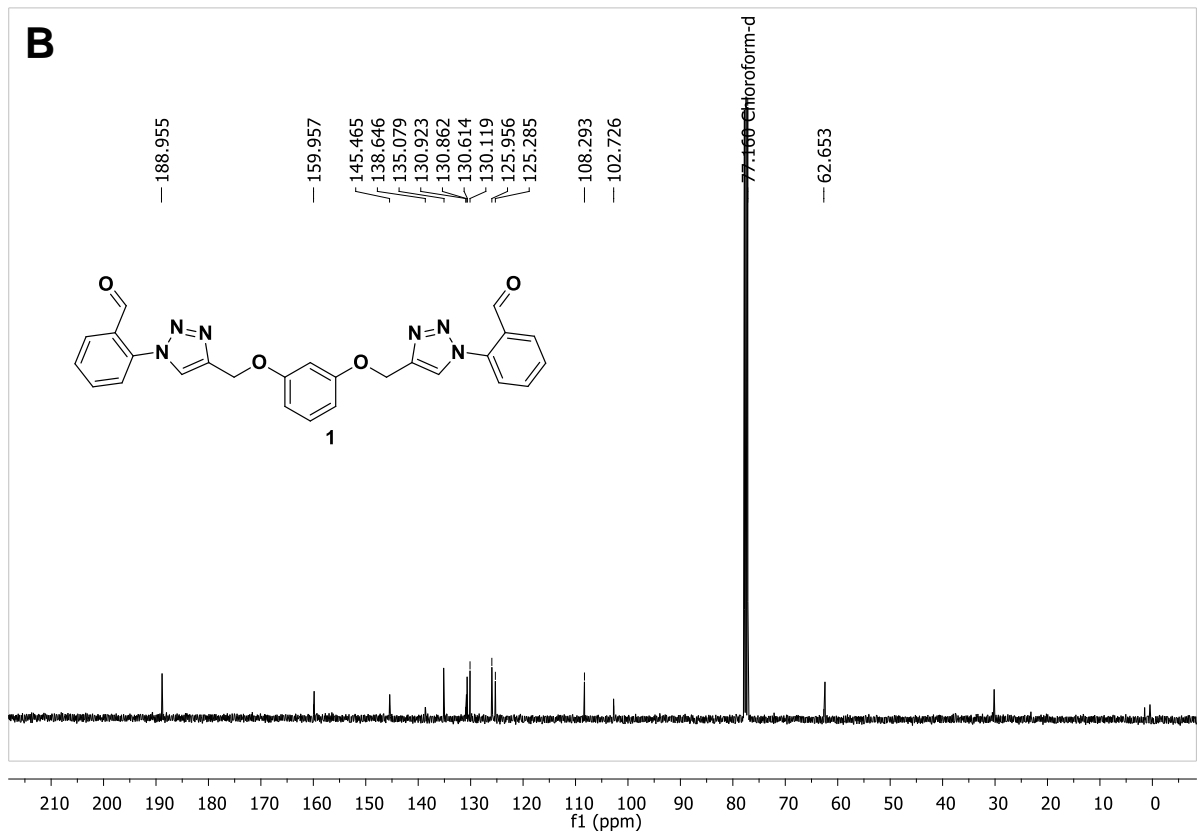

Supplement: fvl-18-865-s1.pdf [file fvl-18-865-s1.pdf]

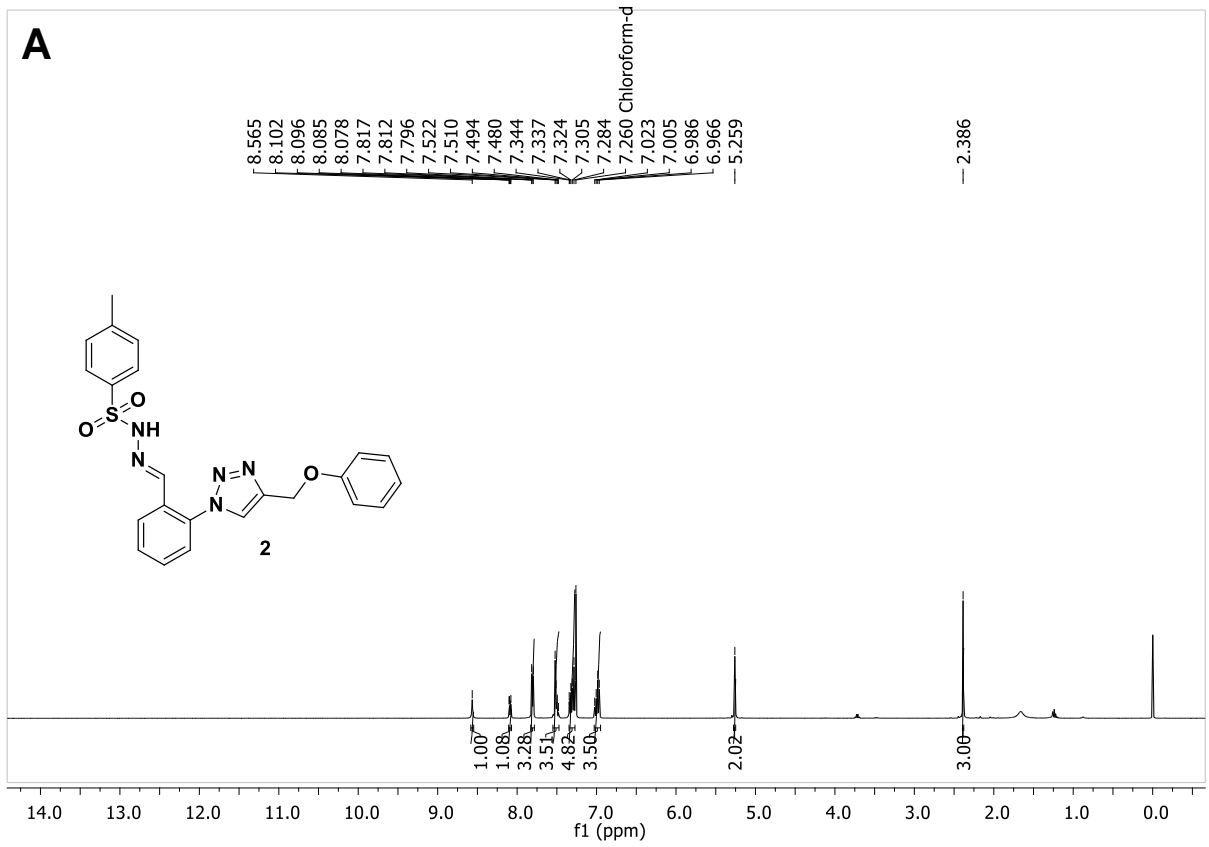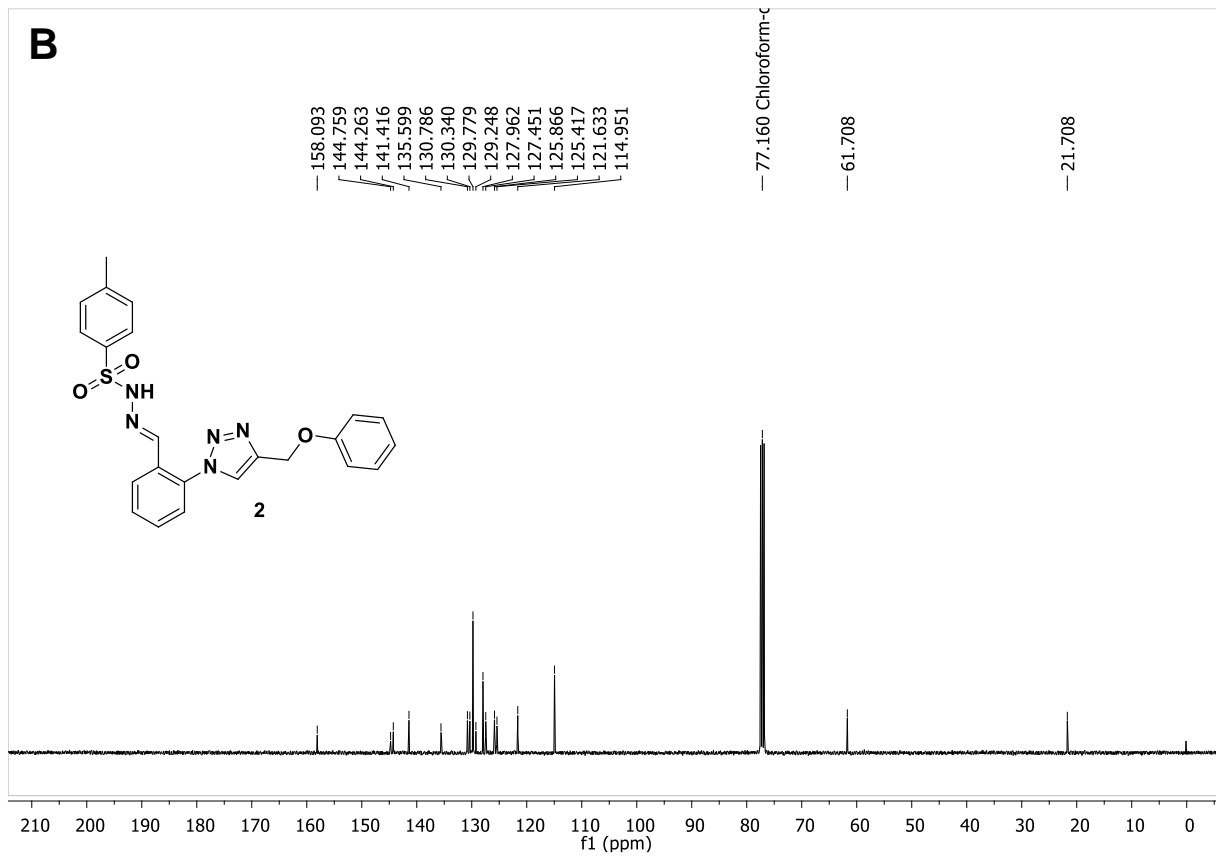

Supplement: fvl-18-865-s2.pdf [file fvl-18-865-s2.pdf]
